# Supplementary material
Source: Springer Nature journal article supplement (http://www.springermedizin.de/resource/supplementary/13063_2014_2161_MOESM3_ESM.pdf/9621486)
Supplement: MOESM3 [file 9621486]

|                                                                                |  |                                        |  |                                        |          |                                        |  |                                        |  |                                        |  |                                        |  |                                        |  |                                       |  |
|--------------------------------------------------------------------------------|--|----------------------------------------|--|----------------------------------------|----------|----------------------------------------|--|----------------------------------------|--|----------------------------------------|--|----------------------------------------|--|----------------------------------------|--|---------------------------------------|--|
|  |  |                                        |  |                                        |          |                                        |  |                                        |  |                                        |  |                                        |  |                                        |  |                                       |  |
| OPERA #110                                                                     |  |                                        |  |                                        | CRF #021 |                                        |  |                                        |  | REPORT NO: 5                           |  |                                        |  |                                        |  |                                       |  |
| SUBJECT ID: <input type="text"/>                                               |  | SUBJECT INITIALS: <input type="text"/> |  | SUBJECT INITIALS: <input type="text"/> |          | SUBJECT INITIALS: <input type="text"/> |  | SUBJECT INITIALS: <input type="text"/> |  | SUBJECT INITIALS: <input type="text"/> |  | SUBJECT INITIALS: <input type="text"/> |  | SUBJECT INITIALS: <input type="text"/> |  | INVESTIGATOR NO: <input type="text"/> |  |
| <small>Centre ID</small>                                                       |  | <small>Subject ID</small>              |  | <small>F</small>                       |          | <small>L</small>                       |  |                                        |  |                                        |  |                                        |  |                                        |  |                                       |  |

Study Subject ID:

↑ OFFICE USE ONLY ↓

The guidelines below will be used conjunction with the OMERACT image atlas (Conaghan P, *et al.* Ann Rheum Dis 2005;64(Suppl 1):i11-21) to score the MRIs of the MCP joints for the study.

### SCORING OF SYNOVITIS

SYNOVITIS is scored on a scale from 0 to 3. 0 is normal, while the scores of 1 to 3 increase by thirds of the presumed maximum volume of enhanced tissue in the synovial compartment on T2-weighted images compared to normal synovial volume:

0) Normal: 0%      1) Mild: 1-33%      2) Moderate: 34-66%      3) Severe: 67-100%

|                 | MCP Joint            |                      |                      |                      | Subtotal Score       |
|-----------------|----------------------|----------------------|----------------------|----------------------|----------------------|
|                 | 2                    | 3                    | 4                    | 5                    |                      |
| Synovitis (0-3) | <input type="text"/> |

### SCORING OF BONE EROSION AND BONE OEDEMA

Score the following from the articular surface (or its best estimated position if absent) to a depth of 1 cm.

BONE EROSION is scored 0-10, according to the proportion (in increments of 10%) of bone involved:

0) 0%      1) 1-10%      2) 11-20%      3) 21-30%      4) 31-40%  
 5) 41-50%      6) 51-60%      7) 61-70%      8) 71-80%      9) 81-90%      10) 91-100%

|                     |          | MCP Joint            |                      |                      |                      | Subtotal Score       |
|---------------------|----------|----------------------|----------------------|----------------------|----------------------|----------------------|
|                     |          | 2                    | 3                    | 4                    | 5                    |                      |
| Bone erosion (0-10) | Proximal | <input type="text"/> |
|                     | Distal   | <input type="text"/> |

BONE OEDEMA is scored 0-3, according to the proportion (in increments of 33%) of bone involved:

0) 0%      1) 1-33%      2) 34-66%      3) 67-100%

|                   |          | MCP Joint            |                      |                      |                      | Subtotal Score       | Total Score          |
|-------------------|----------|----------------------|----------------------|----------------------|----------------------|----------------------|----------------------|
|                   |          | 2                    | 3                    | 4                    | 5                    |                      |                      |
| Bone oedema (0-3) | Proximal | <input type="text"/> |
|                   | Distal   | <input type="text"/> |                      |

Scored by: \_\_\_\_\_

Print Name

Date:

year

month (e.g. JAN)

day

Signature: \_\_\_\_\_
